# Supplementary material for: Health-related quality of life among patients with sepsis in Blantyre, Malawi: an observational cohort study
Source: Research Square preprint supplement (doi:10.21203/rs.3.rs-7840260/v1), 2025-11-19
Supplement: Supplementary file 2 [file 1e633bfe8eeb21fb3f57d1dd.docx]

# S2 Supplementary results

## S2 Table 1: Mean participants' utility scores and VAS at different time points

|  | **Sepsis cases (including deceased)** | **Hospital control** | **Community controls** | **P value** |
| --- | --- | --- | --- | --- |
|  | [N]Mean (95%CI) | [N]Mean (95%CI) | [N]Mean (95%CI) |  |
| **Baseline utility score** | [189] 0.539 (0.500 - 0.578) | [76] 0.760 (0.561 - 0.856) | [91] 0.861 (0.849 - 0.874) | <0.001 |
| **Day 7 utility score** | [134] 0.739 (0.705 - 0.772) | [40] 0.764 (0.714 - 0.814) | - | 0.453 |
| **Day 28 utility score** | [124] 0.552 (0.482 - 0.622) | [21] 0.823 (0.758 - 0.887) | [53] 0.872 (0.859 - 0.886) | <0.001 |
| **Day 90 utility score** | [88] 0.360 (0.270 - 0.450) | [13] 0.846 (0.791 - 0.902) | - | <0.001 |
| **Day 180 utility score** | [71] 0.133 (0.059 - 0.208) | [2] 0.900 (0.900 - 0.900) | [20] 0.879 (0.857 - 0.901) | <0.001 |
| **Baseline VAS score** | [210] 64.1 (61.4 - 66.8) | [87] 61.4 (56.4 - 66.5) | [93] 85.4 (83.3 - 87.5) | <0.001 |
| **Day 7 VAS score** | [157] 69.6 (66.7 - 72.6) | [55] 71.4 (65.7- 77.0) | - | 0.570 |
| **Day 28 VAS score** | [107] 76.2 (72.8 - 79.5) | [15] 76.0 (68.2 - 83.8) | [59] 87.7 (85.6 - 89.8) | <0.001 |
| **Day 90 VAS score** | [61] 79.4 (75.0 -83.9) | [31] 77.2 (71.8 - 82.5) | - | 0.480 |
| **Day 180 VAS score** | [27] 83.4 (77.5 - 89.3) | [11] 82.6 (70.8 - 94.4) | [26] 86.3 (82.2 -90.3) | 0.669 |

Note: This table presents mean (95% Confidence Interval, CI) Utility Scores and VAS scores across five assessment time points (Baseline [Day 0], Day 7, Day 28, Day 90, and Day 180) among sepsis cases, hospital controls, and community controls. Utility scores range from 0 (death) to 1 (perfect health), derived from the EQ-5D-3L index. VAS scores range from 0 (worst health state) to 100 (best health state), representing self-reported health perception. Data are presented as means with 95% Confidence Intervals (CI) and the number of participants [N] per group. One-way ANOVA was used to compare mean Utility and VAS scores across all three groups at each time point. Independent T-tests were used for pairwise comparisons between two groups at each time point (sepsis vs. hospital controls). P-values indicate the statistical significance of differences between groups at each time point. NA (Not Applicable) indicates assessments that have not been done for the groups.

## S2 Table 2: Summary of HRQoL data missingness at different time points

| **Variable** | **n (%) of missing**  **N=425** |
| --- | --- |
| Utility score at baseline | 19 (4.5%) |
| Utility score day 7 | 207 (48.7%) |
| Utility score day 28 | 130 (30.6%) |
| Utility scores day 90 | 227 (53.4%) |
| Utility scores day 180 | 198 (46.6%) |
| VAS score at baseline | 12 (2.8%) |
| VAS score day 7 | 171 (40.2%) |
| VAS score day 28 | 155 (36.5%) |
| VAS scores day 90 | 258 (60.7%) |
| VAS scores day 180 | 249 (58.6%) |

##

## S2 Table 3: Multivariable regression models for EQ-5D utility and VAS scores at baseline and day 180 for sepsis cases

| **Variable** | **Utility score (Baseline)**  **N=189**  **β (95% CI)**  **p value** | **Utility score (Baseline + UVA)**  **N=170**  **β (95% CI)**  **p value** | **Utility score (Day 180)**  **N=71**  **β (95% CI)**  **p value** | **VAS score (Baseline)**  **N=210**  **β (95% CI)**  **p value** | **VAS score (Baseline +UVA)**  **N=190**  **β (95% CI)**  **p value** | **VAS score (Day 180)**  **N=27**  **β (95% CI)**  **p value** |
| --- | --- | --- | --- | --- | --- | --- |
| **Age** (years) | -0.002 (-0.006, 0.001); p=0.186 | -0.002 (-0.006, 0.002); p=0.379 | -0.006 ( -0.010, 0.001); p= 0.013 | -0.257 ( -0.519, 0.006); p= 0.055 | -0.357 ( -0.648, -0.067); p= 0.016 | -0 118 ( -1.196, 0.961); p= 0.819 |
| **Sex** (ref female) |  |  |  |  |  |  |
| Male | 0.089 (0.000, 0.177); p=0.050 | 0.088 (-0.007, 0.183); p=0.069 | 0.014 ( -0.098, 0.126); p= 0.799 | 6.564 (0.264, 12.865); p= 0.041 | 7.767 (1.092, 14.442); p 0.023 | 1.130 ( -15.820, 18.080); p 0.888 |
| **HIV status** (ref negative) |  |  |  |  |  |  |
| Positive | -0.080 (-0.168, 0.007); p=0.073 | - | -0.035 ( -0.150, 0.080); p= 0.546 | 1.345 ( -4.966, 7.655); p= 0.675 | - | -6.563 ( -22.423, 9.296); p= 0.390 |
| Unknown | 0.138 (-0.047, 0.323); p=0.144 | - | 0.042 ( -0.174, 0.257); p= 0.700 | 11.663 ( -2.194, 25.520); p= 0.099 | - | -9.529 ( -50.665, 31.607); p= 0.627 |
| **Active TB status** (Ref no) |  |  |  |  |  |  |
| Yes | -0.084 (-0.191, 0.023); p=0.123 | -0.104 ( -0.214, 0.006); p=0.063 | -0.013 ( -0.121, 0.096); p= 0.818 | -4.621 ( -12.286, 3.043); p= 0.236 | -3.386 ( -11.133, 4.362); p= 0.390 | -19.897 ( -40.826, 1.031); p= 0.061 |
| **Education status** (Ref college or higher |  |  |  |  |  |  |
| No formal schooling | -0.008 (-0.226, 0.210); p=0.943 | -0.063 ( -0.306, 0.180); p= 0.608 | 0.190 ( -0.029, 0.409); p= 0.088 | -7.033 ( -22.213, 8.147); p= 0.362 | -10.806 ( -27.293, 5.681); p= 0.198 | - |
| Primary incomplete or complete | 0.041 (-0.109, 0.190); p= 0.592 | 0.027 ( -0.135, 0.189); p= 0.744 | 0.033 ( -0.141, 0.207); p= 0.705 | -2.917 ( -13.763, 7.930); p= 0.596 | -3.486 ( -15.024, 8.052); p= 0.552 | 0.094 (- -31.088, 31.277); p 0.995 |
| Secondary school completed | 0.047 (- -0.110, 0.204); p 0.553 | 0.026 ( -0.144, 0.196); p= 0.763 | 0.064 ( -0.126, 0.254); p= 0.501 | 1.931 ( -9.499, 13.360); p= 0.739 | 0.791 (- -11.369, 12.951); p 0.898 | -3.090 ( -42.525, 36.345); p= 0.869 |
| Some secondary education | -0.014 (-0.170, 0.141); p= 0.858 | -0.038 ( -0.209, 0.134); p=0.666 | 0.148 ( -0.049, 0.345); p= 0.138 | -0.790 ( -12.008, 10.427); p= 0.890 | -2.966 ( -15.057, 9.125); p= 0.629 | 7.756 ( -23.058, 38.570); p= 0.598 |
| **Occupation** (Ref currently employed) |  |  |  |  |  |  |
| Retired | 0.437 ( -0.092, 0.966); p= 0.105 | 0.495 (-0.052, 1.043); p= 0.076 | - | -19.155 ( -59.026, 20.717); p= 0.345 | -16.578 ( -57.270, 24.115); p= 0.422 | - |
| Self-employed | -0.062 (-0.175, 0.051); p= 0.278 | -0.034 ( -0.157, 0.088); p= 0.580 | 0.037 ( -0.096, 0.170); p= 0.581 | -2.034 ( -9.925, 5.857); = 0.612 | -0.622 ( -8.966, 7.723); p= 0.883 | 2.841 ( -21.942, 27.624); p= 0.809 |
| Student | -0 044 (-0.200, 0.113); p= 0.584 | -0.001 ( -0.173, 0.172); p= 0.995 | 0.006 ( -0.205, 0.217); p= 0.957 | 1.489 ( -9.497, 12.476); p= 0.789 | 0.704 (- -11.074, 12.481); p 0.906 | -15.999 ( -53.609, 21.610); p= 0.377 |
| Unemployed | 0.034 (-0.080, 0.149); p= 0.556 | 0.046 ( -0.077, 0.168); p= 0.461 | 0.008 ( -0.132, 0.148); p= 0.908 | 3.284 ( -4.863, 11.431); p= 0.428 | 3.447 ( -5.062, 11.956); p= 0.425 | -6.633 ( -30.431, 17.166); p= 0.560 |
| **Days unwell before admission** | -0.001 (-0.002, -0.000); p= 0.013 | -0.002 ( -0.003 -0.000); p= 0.039 | -0.001 ( -0.001, -0.000); p= 0.003 | -0.040 ( -0.089, 0.010); p= 0.114 | -0.033 ( -0.141, 0.076); p= 0.553 | -0.057 ( -0.603, 0.490); p= 0.827 |
| **UVA** | - | -0.025 ( -0.051 - 0.002) P= 0.068 | - | - | -0.569 ( -2.434 - 1.295)P= 0.547 | - |

S2 Figure 1: Mean EQ-5D utility scores across groups at different time points

Note: The bar chart displays mean EQ-5D utility scores with standard deviation error bars for sepsis cases (pink bars), hospital controls (green bars), and community controls (blue bars) at baseline, day 28, and day 180. Error bars represent one standard deviation around the mean. Sample sizes: baseline (sepsis cases n=189, hospital controls n=76, community controls n=91), day 28 (sepsis cases n=124, hospital controls n=21, community controls n=53), day 180 (sepsis cases n=71, hospital controls n=2, community controls n=20).

S2 Figure 2: Mean EQ-5D VAS scores across groups at different time points

Note: The bar chart displays mean EQ-5D VAS scores with standard deviation error bars for sepsis cases (pink bars), hospital controls (green bars), and community controls (blue bars) at baseline, day 28, and day 180. Error bars represent one standard deviation around the mean. Sample sizes: baseline (sepsis cases n=210, hospital controls n=87, community controls n=93), day 28 (sepsis cases n=107, hospital controls n=31, community controls n=59), day 180 (sepsis cases n=27, hospital controls n=11, community controls n=26).
